# Supplementary material for: Detection of Parasite-Specific DNA in Urine Sediment Obtained by Filtration Differentiates between Single and Mixed Infections of Schistosoma mansoni and S. haematobium from Endemic Areas in Ghana
Source: PubMed Central journal article supplement (PMC3954594; doi:10.1371/journal.pone.0091144), 2014-03-14
Supplement: pone.0091144.s001.pdf [file pone.0091144.s001.pdf]

# NOGUCHI MEMORIAL INSTITUTE FOR MEDICAL RESEARCH

*Established 1979 A Constituent of the College of Health Sciences*  
University of Ghana

Phone: +233-302-916438 (Direct)  
+233-289-522574  
Fax: +233-21-502182/513202  
E-mail: nirb@noguchi.mimcom.org

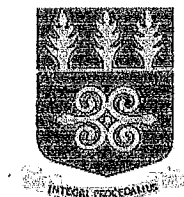

NMIMR-IRB  
P. O. Box LG 581  
Legon, Accra  
Ghana

My Reference: DF 22

November 15, 2012  
Professor K. M. Bosompem  
Noguchi Memorial Institute for Medical Research, University of Ghana  
P. O. Box LG 581  
Legon, Accra

**RE: Our Study # 043/12-13**  
RESEARCH-IRB

**At: NOGUCHI MEMORIAL INSTITUTE FOR MEDICAL**

Dear Professor K. M. Bosompem:

**Meeting Date:** 11/14/2012  
RESEARCH-IRB

**At: NOGUCHI MEMORIAL INSTITUTE FOR MEDICAL**

**Protocol Title:**

Field Testing for the detection of schistome specific DNA using LAMP amplification

This is to advise you that the above referenced Study has been presented to the Institutional Review Board, and the following action taken subject to the conditions and explanation provided below.

**Internal #:** New Appl  
**Expiration Date:** 11/13/2013  
**On Agenda For:** Initial Submission  
**Reason 1:**  
**Description:** Date Received- 10/23/2012  
**IRB ACTION:** Approved  
**Condition 1:**  
**Action**  
**Explanation:**

**Reason 2:**

Yours Sincerely,

Helena Baidoo  
IRB Administrator  
NMIMR-IRB

cc: Dr. Joseph Hamburger, Hebrew University of Jerusalem (HU), Prof. Clive Shiff, PhD,  
John Hopkins Bloomberg School of Public Health
